# Supplementary material for: MicroRNAs, miR-23a-3p and miR-151-3p, Are Regulated in Dentate Gyrus Neuropil following Induction of Long-Term Potentiation In Vivo
Source: PubMed Central journal article supplement (PMC5268419; doi:10.1371/journal.pone.0170407), 2017-01-26
Supplement: pone.0170407.s001.pdf [file pone.0170407.s001.pdf]

**S1 Table: Predicted mRNA targets of miR-23a-3p**

| <b>Official Gene Symbol</b> | <b>Gene Name</b>                           | <b>Official Gene Symbol</b> | <b>Gene Name</b>                                                                              | <b>Official Gene Symbol</b> | <b>Gene Name</b>                               | <b>Official Gene Symbol</b> | <b>Gene Name</b>                                                                                                                                                     |
|-----------------------------|--------------------------------------------|-----------------------------|-----------------------------------------------------------------------------------------------|-----------------------------|------------------------------------------------|-----------------------------|----------------------------------------------------------------------------------------------------------------------------------------------------------------------|
| BCLAF1                      | BCL2-associated transcription factor 1     | ACTN2                       | actinin alpha 2                                                                               | HNRPDL                      | heterogeneous nuclear ribonucleoprotein D-like | PKIA                        | protein kinase (cAMP-dependent, catalytic) inhibitor alpha                                                                                                           |
| CTCF                        | CCCTC-binding factor (zinc finger protein) | ABT1                        | activator of basal transcription 1                                                            | IRS2                        | insulin receptor substrate 2                   | RXRG                        | retinoid X receptor gamma                                                                                                                                            |
| CNOT2                       | CCR4-NOT transcription complex, subunit 2  | ADNP                        | activity-dependent neuroprotector homeobox                                                    | IRF2                        | interferon regulatory factor 2                 | RNF10                       | ring finger protein 10                                                                                                                                               |
| GPBP1                       | GC-rich promoter binding protein 1         | ATRX                        | alpha thalassemia/mental retardation syndrome X-linked (RAD54 homolog, <i>S. cerevisiae</i> ) | LRPPRC                      | leucine-rich PPR-motif containing              | RUNX1T1                     | runt-related transcription factor 1; translocated to, 1 (cyclin D-related)                                                                                           |
| GZF1                        | GDNF-inducible zinc finger protein 1       | AHR                         | aryl hydrocarbon receptor                                                                     | KDM4A                       | lysine (K)-specific demethylase 4A             | SAFB                        | scaffold attachment factor B                                                                                                                                         |
| JAZF1                       | JAZF zinc finger 1                         | ARNT                        | aryl hydrocarbon receptor nuclear translocator                                                | MED14                       | mediator complex subunit 14                    | H3F3B                       | similar to H3 histone, family 3B; similar to Zgc:56193; similar to H3 histone, family 3A; H3 histone, family 3B; similar to Histone H3.3; similar to histone 1, H2ai |
| KLF10                       | Kruppel-like factor 10                     | BLOC1S2                     | biogenesis of lysosomal organelles complex-1, subunit 2                                       | MTERF                       | mitochondrial transcription termination factor | HMGN2                       | similar to Nonhistone chromosomal protein HMG-17 (High-mobility group nucleosome binding domain 2); high mobility group nucleosomal binding                          |

|         |                                                                                                   |         |                                                                               |        |                                                             |         |                                                          |
|---------|---------------------------------------------------------------------------------------------------|---------|-------------------------------------------------------------------------------|--------|-------------------------------------------------------------|---------|----------------------------------------------------------|
|         |                                                                                                   |         |                                                                               |        |                                                             |         | domain 2                                                 |
| MEIS2   | Meis homeobox 2                                                                                   | BAZ2B   | bromodomain adjacent to zinc finger domain, 2B                                | MAPK14 | mitogen activated protein kinase 14                         | SSBP2   | single-stranded DNA binding protein 2                    |
| PTK2B   | PTK2B protein tyrosine kinase 2 beta                                                              | CCK     | cholecystokinin                                                               | NFIB   | nuclear factor I/B                                          | SNCA    | synuclein, alpha (non A4 component of amyloid precursor) |
| SKP1    | S-phase kinase-associated protein 1                                                               | CBFA2T2 | core-binding factor, runt domain, alpha subunit 2, translocated to, 2 (human) | NCOA6  | nuclear receptor coactivator 6                              | TERF2   | telomeric repeat binding factor 2                        |
| SATB2   | SATB homeobox 2                                                                                   | CCND1   | cyclin D1                                                                     | NPM1   | nucleophosmin (nucleolar phosphoprotein B23, numatrin)      | TRAPPC2 | trafficking protein particle complex 2; sedlin-like      |
| SRPK1   | SFRS protein kinase 1                                                                             | CCNL2   | cyclin L2                                                                     | OBFC2A | oligonucleotide/oligosacch aride-binding fold containing 2A | TSNAX   | translin-associated factor X                             |
| SMAD3   | SMAD family member 3                                                                              | ETV1    | ets variant 1                                                                 | PEBP1  | phosphatidylethanolamine binding protein 1                  | ZC3H8   | zinc finger CCCH type containing 8                       |
| SMARCC1 | SWI/SNF related, matrix associated, actin dependent regulator of chromatin, subfamily c, member 1 | FGF2    | fibroblast growth factor 2                                                    | PBRM1  | polybromo 1                                                 | ZFR     | zinc finger RNA binding protein                          |
| ANP32A  | acidic (leucine-rich) nuclear phosphoprotein 32 family, member A                                  | FOXK1   | forkhead box K1                                                               | PDCD4  | programmed cell death 4                                     | ZBTB38  | zinc finger and BTB domain containing 38                 |
